# Supplementary material
Source: PubMed Central journal article supplement (PMC9341240)
Supplement: NIHMS1816630-supplement-1.pdf [file NIHMS1816630-supplement-1.pdf]

**Search terms**

***'Optical coherence tomography' OR 'foveal hypoplasia' \****

**AND**

**Diagnostic groups\*\***

***Albinism***

**OR**

***Achromatopsia***

**OR**

***PAX6***

**OR**

***SLC38A8***

**OR**

***FRMD7***

**OR**

***AHR***

**Total studies**

***n = 397***

**Eligible studies**

***n = 53***

**Eligible patients**

***n = 384***

***\*Date filter applied between 01.01.2011 – 01.04.2021***

***\*\* And additional search terms e.g. "aniridia", "OA"***
