# Supplementary material
Source: PubMed Central journal article supplement (PMC9341240)
Supplement: NIHMS1816630-supplement-3.pdf [file NIHMS1816630-supplement-3.pdf]

| Study Number | Paper Title                                                                                                                                                         | First Author              | Year of Publication | Journal                                        | PMID     | Country of Study | Total Study Cohort* | Included in this Study | Condition     |
|--------------|---------------------------------------------------------------------------------------------------------------------------------------------------------------------|---------------------------|---------------------|------------------------------------------------|----------|------------------|---------------------|------------------------|---------------|
| 1            | Evidence of macular pigment in the central macula in albinism                                                                                                       | Wolfson Y et al.,         | 2016                | Experimental Eye Research                      | 26474496 | USA              | 4                   | 3                      | Albinism      |
| 2            | The ophthalmic presentation of Hermansky-Pudlak syndrome 6                                                                                                          | Hull S et al.,            | 2016                | British Journal of Ophthalmology               | 26823395 | India            | 3                   | 3                      | Albinism      |
| 3            | A Japanese Family With Autosomal Dominant Oculocutaneous Albinism Type 4                                                                                            | Oki R et al.,             | 2016                | Investigative Ophthalmology and Visual Science | 28192564 | Japan            | 16                  | 14                     | Albinism      |
| 4            | Molecular genetic and clinical evaluation of three Chinese families with X-linked ocular albinism                                                                   | Zou X et al.,             | 2017                | Scientific Reports                             | 28211458 | China            | 4                   | 3                      | Albinism      |
| 5            | The Henle Fiber Layer in Albinism: Comparison to Normal and Relationship to Outer Nuclear Layer Thickness and Foveal Cone Density                                   | Lee DJ et al.,            | 2018                | Investigative Ophthalmology and Visual Science | 30398625 | USA              | 38                  | 4                      | Albinism      |
| 6            | Bilateral atypical lamellar holes in a patient with oculocutaneous albinism                                                                                         | Falcone MM et al.,        | 2020                | Ophthalmic Genetics                            | 32543925 | UK               | 1                   | 1                      | Albinism      |
| 7            | PAX6 Genotypic and Retinal Phenotypic Characterization in Congenital Aniridia                                                                                       | Pedersen HR et al.,       | 2020                | Investigative Ophthalmology and Visual Science | 32396632 | Norway           | 95                  | 23                     | PAX6          |
| 8            | Correlation of novel PAX6 gene abnormalities in aniridia and clinical presentation                                                                                  | Sannan NS et al.,         | 2017                | Canadian Journal of Ophthalmology              | 29217025 | Canada           | 33                  | 25                     | PAX6          |
| 9            | PAX6 missense variants in two families with isolated foveal hypoplasia and nystagmus: evidence of paternal postzygotic mosaicism.                                   | Cunha DL et al.,          | 2021                | European Journal of Human Genetics             | 33024313 | UK               | 6                   | 4                      | PAX6          |
| 10           | Autosomal dominant foveal hypoplasia without visible macular abnormalities and PAX6 mutations.                                                                      | Matsushita I et al.,      | 2020                | Japanese Journal of Ophthalmology              | 32857266 | Japan            | 4                   | 4                      | PAX6          |
| 11           | Nonsense suppression induced readthrough of a novel PAX6 mutation in patient-derived cells of congenital aniridia.                                                  | Liu X et al.,             | 2020                | Molecular Genetics and Genomic Medicine        | 32125788 | China            | 12                  | 1                      | PAX6          |
| 12           | Impaired DNA-binding affinity of novel PAX6 mutations.                                                                                                              | Lee S et al.,             | 2020                | Scientific Reports                             | 32080308 | South Korea      | 5                   | 5                      | PAX6          |
| 13           | Recurrent PAX6 mutation in a Chinese family with congenital aniridia, progressive cataracts and mental retardation.                                                 | Chen DD et al.,           | 2020                | European Journal of Ophthalmology              | 30426773 | China            | 11                  | 4                      | PAX6          |
| 14           | Aniridia due to a novel microdeletion affecting PAX6 regulatory enhancers: case report and review of the literature.                                                | Syrimis A et al.,         | 2018                | Journal of Genetics                            | 29932076 | Cyprus           | 2                   | 2                      | PAX6          |
| 15           | Novel PAX6 mutation reported in an aniridia patient.                                                                                                                | Winegarner A et al.,      | 2017                | Human Genome Variation                         | 29238604 | Japan            | 1                   | 1                      | PAX6          |
| 16           | Newly identified paired box 6 mutation of variant familial aniridia: Congenital iris ectropion with foveal hypoplasia.                                              | Kim WJ et al.,            | 2017                | Indian Journal of Ophthalmology                | 28300742 | South Korea      | 2                   | 2                      | PAX6          |
| 17           | A novel de novo duplication mutation of PAX6 in a Chinese family with aniridia and other ocular abnormalities                                                       | Zhuang J et al.,          | 2014                | Scientific Reports                             | 24787241 | China            | 5                   | 1                      | PAX6          |
| 18           | The Role of Optical Coherence Tomography in an Atypical Case of Oculocutaneous Albinism: A Case Report                                                              | Rossi S et al.,           | 2012                | Case Reports in Ophthalmology                  | 22548044 | Italy            | 1                   | 1                      | Albinism      |
| 19           | A novel splicing site mutation of the GPR143 gene in a Chinese X-linked ocular albinism pedigree                                                                    | Cai CY et al.,            | 2013                | Genetics and Molecular Research                | 24301936 | China            | 1                   | 1                      | Albinism      |
| 20           | A new phenotype of recessively inherited foveal hypoplasia and anterior segment dysgenesis maps to a locus on chromosome 16q23.2-24.2                               | Pal B et al.,             | 2014                | Journal of Medical Genetics                    | 15466012 | UK               | 16                  | 1                      | SLC38A8       |
| 21           | A new recessively inherited disorder composed of foveal hypoplasia, optic nerve decussation defects and anterior segment dysgenesis maps to chromosome 16q23.3-24.1 | Al-Araimi M et al.,       | 2013                | Molecular Vision                               | 24194637 | Pakistan         | 7                   | 3                      | SLC38A8       |
| 22           | Novel Biallelic Variants and Phenotypic Features in Patients with SLC38A8-Related Foveal Hypoplasia                                                                 | Schiff ER et al.,         | 2021                | International Journal of Molecular Sciences    | 33498813 | UK               | 9                   | 6                      | SLC38A8       |
| 23           | Structural modeling of a novel SLC38A8 mutation that causes foveal hypoplasia                                                                                       | Toral MA et al.,          | 2017                | Molecular Genetics and Genomic Medicine        | 28546991 | USA              | 2                   | 2                      | SLC38A8       |
| 24           | Genetic causes of nystagmus, foveal hypoplasia and subnormal visual acuity- other than albinism                                                                     | Ehrenberg M et al.,       | 2021                | Ophthalmic Genetics                            | 33594928 | Israel           | 31                  | 4                      | SLC38A8       |
| 25           | The pathogenicity of SLC38A8 in five families with foveal hypoplasia and congenital nystagmus                                                                       | Weiner C et al.,          | 2020                | Experimental Eye Research                      | 32032626 | Israel           | 8                   | 1                      | SLC38A8       |
| 26           | Homozygous stop mutation in AHR causes autosomal recessive foveal hypoplasia and infantile nystagmus                                                                | Mayer AK et al.,          | 2019                | Brain                                          | 31009037 | UK               | 2                   | 2                      | AHR           |
| 27           | Correlation between electroretinography, foveal anatomy and visual acuity in albinism                                                                               | Hu Z et al.,              | 2019                | Advances in Ophthalmology                      | 30927186 | USA              | 35                  | 16                     | Albinism      |
| 28           | Clinical and Molecular Characterization of Achromatopsia Patients: A Longitudinal Study                                                                             | Brunetti-Pierri R et al., | 2021                | International Journal of Molecular Sciences    | 33562422 | Italy            | 21                  | 3                      | Achromatopsia |
| 29           | Long-Term Investigation of Retinal Function in Patients with Achromatopsia                                                                                          | Georgiou M et al.,        | 2020                | Investigative Ophthalmology and Visual Science | 32960951 | UK               | 18                  | 17                     | Achromatopsia |
| 30           | Phenotype Driven Analysis of Whole Genome Sequencing Identifies Deep Intronic Variants that Cause Retinal Dystrophies by Aberrant Exonization                       | Di Scipio M et al.,       | 2020                | Investigative Ophthalmology and Visual Science | 32881472 | Canada           | 15                  | 1                      | Achromatopsia |
| 31           | Retinal Structure and Function in Achromatopsia: Implications for Gene Therapy                                                                                      | Sundaram V et al.,        | 2014                | Ophthalmology                                  | 24148654 | UK               | 40                  | 36                     | Achromatopsia |
| 32           | Photoreceptor structure and function in patients with congenital achromatopsia                                                                                      | Genead MA et al.,         | 2011                | Investigative Ophthalmology and Visual Science | 21778272 | USA              | 12                  | 11                     | Achromatopsia |
| 33           | Diagnostic fundus autofluorescence patterns in achromatopsia                                                                                                        | Fahim AT et al.,          | 2013                | American Journal of Ophthalmology              | 23972307 | USA & Germany    | 10                  | 8                      | Achromatopsia |
| 34           | Spectral-domain optical coherence tomography staging and autofluorescence imaging in achromatopsia                                                                  | Greenberg JP et al.,      | 2014                | JAMA Ophthalmology                             | 24504161 | USA              | 17                  | 6                      | Achromatopsia |
| 35           | Retinal morphology of patients with achromatopsia during early childhood: implications for gene therapy                                                             | Yang P et al.,            | 2014                | JAMA Ophthalmology                             | 24676353 | USA              | 18                  | 8                      | Achromatopsia |
| 36           | Genotype-Dependent Variability in Residual Cone Structure in Achromatopsia: Toward Developing Metrics for Assessing Cone Health                                     | Dubis AM et al.,          | 2014                | Investigative Ophthalmology and Visual Science | 25277229 | UK               | 18                  | 4                      | Achromatopsia |

|    |                                                                                                                                                        |                      |      |                                                |          |                    |    |    |               |
|----|--------------------------------------------------------------------------------------------------------------------------------------------------------|----------------------|------|------------------------------------------------|----------|--------------------|----|----|---------------|
| 37 | Congenital Achromatopsia and Macular Atrophy Caused by a Novel Recessive PDE6C Mutation (p.E591K)                                                      | Katagiri S et al.,   | 2015 | Ophthalmic Genetics                            | 25605338 | Japan              | 4  | 2  | Achromatopsia |
| 38 | Novel CNGA3 mutations in Chinese patients with achromatopsia                                                                                           | Lang X et al.,       | 2015 | British Journal of Ophthalmology               | 25637600 | China              | 15 | 13 | Achromatopsia |
| 39 | Novel mutations in the gene for $\alpha$ -subunit of retinal cone cyclic nucleotide-gated channels in a Japanese patient with congenital achromatopsia | Kuniyoshi K et al.,  | 2016 | Japanese Journal of Ophthalmology              | 27040408 | UK                 | 1  | 1  | Achromatopsia |
| 40 | Residual Foveal Cone Structure in CNGB3-Associated Achromatopsia                                                                                       | Langlo CS et al.,    | 2016 | Investigative Ophthalmology and Visual Science | 27479814 | USA                | 51 | 5  | Achromatopsia |
| 41 | In vivo imaging of a cone mosaic in a patient with achromatopsia associated with a GNAT2 variant                                                       | Ueno S et al.,       | 2017 | Japanese Journal of Ophthalmology              | 27718025 | Japan              | 1  | 1  | Achromatopsia |
| 42 | Repeatability and longitudinal assessment of foveal cone structure in CNGB3-associated achromatopsia                                                   | Langlo CS et al.,    | 2017 | Retina                                         | 28145975 | USA                | 41 | 3  | Achromatopsia |
| 43 | The clinical phenotype of CNGA3-related achromatopsia: pretreatment characterisation in preparation of a gene replacement therapy trial                | Zobor D et al.,      | 2017 | Investigative Ophthalmology and Visual Science | 28159970 | Germany            | 36 | 34 | Achromatopsia |
| 44 | Multimodal imaging including semiquantitative short-wavelength and near-infrared autofluorescence in achromatopsia                                     | Metet A et al.,      | 2018 | Scientific Reports                             | 29618791 | France and Germany | 16 | 16 | Achromatopsia |
| 45 | Novel causative variants in patients with achromatopsia                                                                                                | Abdelkader E et al., | 2018 | Ophthalmic Genetics                            | 30289319 | Egypt              | 7  | 3  | Achromatopsia |
| 46 | Longitudinal Assessment of Retinal Structure in Achromatopsia Patients With Long-Term Follow-up                                                        | Hirji N et al.,      | 2018 | Investigative Ophthalmology and Visual Science | 30513534 | UK                 | 50 | 21 | Achromatopsia |
| 47 | Adaptive Optics Retinal Imaging in CNGA3-Associated Achromatopsia: Retinal Characterization, Interocular Symmetry, and Intrafamilial Variability       | Georgiou M et al.,   | 2019 | Investigative Ophthalmology and Visual Science | 30682209 | UK                 | 38 | 18 | Achromatopsia |
| 48 | Characterization of Retinal Structure in ATF6-Associated Achromatopsia                                                                                 | Mastey RR et al.,    | 2019 | Investigative Ophthalmology and Visual Science | 31237654 | USA                | 7  | 7  | Achromatopsia |
| 49 | Deep Phenotyping of PDE6C-Associated Achromatopsia                                                                                                     | Georgiou M et al.,   | 2019 | Investigative Ophthalmology and Visual Science | 31826238 | UK                 | 8  | 7  | Achromatopsia |
| 50 | Macular maldevelopment in ATF6-mediated retinal dysfunction                                                                                            | Ritter M et al.,     | 2019 | Ophthalmic Genetics                            | 31900015 | UK                 | 2  | 2  | Achromatopsia |
| 51 | Photoreceptor Structure in GNAT2-Associated Achromatopsia                                                                                              | Georgiou M et al.,   | 2020 | Investigative Ophthalmology and Visual Science | 32203983 | UK                 | 9  | 4  | Achromatopsia |
| 52 | Multiexon deletion alleles of ATF6 linked to achromatopsia                                                                                             | Lee E-J et al.,      | 2020 | JCI Insight                                    | 32271167 | USA                | 3  | 1  | Achromatopsia |
| 53 | Mutations in the unfolded protein response regulator ATF6 cause the cone dysfunction disorder achromatopsia                                            | Kohl S et al.,       | 2015 | Nature Genetics                                | 26029869 | Germany            | 18 | 15 | Achromatopsia |

\*Total study cohort includes all subjects (disease and control groups) in the original study irrespective of whether there is OCT imaging data/molecular diagnosis.
