# Supplementary material
Source: PubMed Central journal article supplement (PMC9341240)
Supplement: NIHMS1816630-supplement-4.pdf [file NIHMS1816630-supplement-4.pdf]

**(A) Variant zygosity for each diagnostic group associated with typical foveal hypoplasia**

| <b>Diagnosis</b> | <b>Variant zygosity</b>      |                   |                   |                     |
|------------------|------------------------------|-------------------|-------------------|---------------------|
|                  | <b>Compound heterozygous</b> | <b>Homozygous</b> | <b>Hemizygous</b> | <b>Heterozygous</b> |
| <i>Albinism</i>  | 149                          | 77                | 48                | 55                  |
| <i>PAX6</i>      | 0                            | 0                 | 0                 | 106                 |
| <i>SLC38A8</i>   | 17                           | 16                | 0                 | 0                   |
| <i>AHR</i>       | 0                            | 2                 | 0                 | 0                   |
| <i>FRMD7</i>     | 0                            | 0                 | 11                | 6                   |

**(B) Type of mutation for each diagnostic group associated with typical foveal hypoplasia**

| <b>Diagnosis</b> | <b>Variant</b>  |                 |               |               |            |
|------------------|-----------------|-----------------|---------------|---------------|------------|
|                  | <b>missense</b> | <b>nonsense</b> | <b>in_del</b> | <b>splice</b> | <b>CTE</b> |
| <i>Albinism</i>  | 234             | 18              | 61            | 16            | 0          |
| <i>PAX6</i>      | 35              | 16              | 38            | 12            | 5          |
| <i>SLC38A8</i>   | 20              | 7               | 4             | 2             | 0          |
| <i>AHR</i>       | 0               | 2               | 0             | 0             | 0          |
| <i>FRMD7</i>     | 8               | 1               | 2             | 6             | 0          |

| <b>Diagnosis</b> | <b>Variant (Allele 2 in compound heterozygous cases)</b> |                 |               |               |
|------------------|----------------------------------------------------------|-----------------|---------------|---------------|
|                  | <b>missense</b>                                          | <b>nonsense</b> | <b>in_del</b> | <b>splice</b> |
| <i>Albinism</i>  | 117                                                      | 9               | 17            | 6             |
| <i>SLC38A8</i>   | 6                                                        | 2               | 5             | 4             |
