# Supplementary material
Source: PubMed Central journal article supplement (PMC9341240)
Supplement: NIHMS1816630-supplement-5.pdf [file NIHMS1816630-supplement-5.pdf]

| <i>Country</i> | <i>Number of Subjects</i> | <i>OCT Device Used</i>                            | <i>Directionality of Scan Acquisition</i> | <i>OCT protocol details</i>                                                                                                                                  | <i>VA Test Used</i>             |
|----------------|---------------------------|---------------------------------------------------|-------------------------------------------|--------------------------------------------------------------------------------------------------------------------------------------------------------------|---------------------------------|
| UK             | 189                       | Leica Envisu and Optopol Copernicus HR            | Horizontal                                | Leica: 12x8mm (AxB: 600x80) and Copernicus HR: 7x7mm (AxB: 743x75) scan windows centred on the fovea                                                         | Keeler LogMAR and Snellen       |
| South Korea    | 96                        | Heidelberg Spectralis                             | Horizontal                                | 30 degree (scan window) centred on the fovea: X: 768 pixel (8.3 mm), size Y: 496 pixel (1.9 mm) ART mode on. Four scan trials per patient for foveal capture | Snellen                         |
| Denmark        | 79                        | Topcon                                            | Horizontal                                | 6x6mm centred on the fovea - 3D scan (AxB: 512x128)                                                                                                          | ETDRS                           |
| Netherlands    | 69                        | RT-Vue                                            | Horizontal and Radial                     | Combination of line scans and MM6 scans (12 radial line scans: AxB: 1024x12) centred on the fovea                                                            | ETDRS                           |
| USA            | 31                        | Leica Envisu, Ziess Cirrus, Heidelberg Spectralis | Horizontal                                | 20° x 20° with 25 B-scans and 6x6mm (AxB: 200x200) centred on the fovea                                                                                      | Single Surround HOTV<br>Snellen |
| China          | 19                        | Heidelberg Spectralis                             | Horizontal                                | High resolution mode - (30 degree scan angle) - combination of multiple single line and raster scan centred on the fovea                                     | Snellen                         |
| France         | 17                        | Heidelberg Spectralis                             | Horizontal                                | High resolution mode (30 degree scan angle) combination of multiple single and raster scans centres on the fovea                                             | ETDRS / Teller                  |
| Brazil         | 12                        | Triton-Topcon                                     | Horizontal                                | 7x7mm centred on the fovea - 3D scan (AxB: 512x256)                                                                                                          | Snellen                         |
| Australia      | 11                        | Heidelberg Spectralis                             | Horizontal                                | High resolution mode - combination of multiple single line and raster scan 61 slices, 30 (H) x 25 (V) region                                                 | ETDRS                           |
