# Supplementary material
Source: PubMed Central journal article supplement (PMC9341240)
Supplement: NIHMS1816630-supplement-6.pdf [file NIHMS1816630-supplement-6.pdf]

***H0: The proportions of cases of foveal hypoplasia with (PRS+) and without (PRS-) cone photoreceptor specialisation for each genetic etiology are equal***

Pearson chi-squared test

|                          |         |
|--------------------------|---------|
| X <sup>2</sup> statistic | 68.36   |
| DF                       | 3       |
| Asymptotic p-value       | <0.0001 |

***H0: The proportions of cases of foveal hypoplasia with (PRS+) and without (PRS-) cone photoreceptor specialisation for albinism subtypes are equal***

Pearson chi-squared test

|                          |         |
|--------------------------|---------|
| X <sup>2</sup> statistic | 23.29   |
| DF                       | 2       |
| Asymptotic p-value       | <0.0001 |

***H0: The median visual acuity of the populations (different genetic etiologies associated with foveal hypoplasia) are all equal***

Kruskal-Wallis test

|                              |         |
|------------------------------|---------|
| H statistic                  | 22.01   |
| X <sup>2</sup> approximation | 22.01   |
| DF                           | 3       |
| p-value                      | <0.0001 |

| Group    | Visual acuity (logMAR) |        |              |
|----------|------------------------|--------|--------------|
|          | 1st Quartile           | Median | 3rd Quartile |
| Albinism | 0.42                   | 0.62   | 0.81         |
| FRMD7    | 0.30                   | 0.30   | 0.42         |
| PAX6     | 0.40                   | 0.57   | 0.77         |
| SLC38A8  | 0.41                   | 0.46   | 0.61         |

***H0: The median visual acuity of the populations (albinism subtypes) are all equal***

Kruskal-Wallis test

|                              |         |
|------------------------------|---------|
| H statistic                  | 18.43   |
| X <sup>2</sup> approximation | 18.43   |
| DF                           | 2       |
| p-value                      | <0.0001 |

| Group | Visual acuity (logMAR) |        |              |
|-------|------------------------|--------|--------------|
|       | 1st Quartile           | Median | 3rd Quartile |
| HPS   | 0.69                   | 0.85   | 1.00         |
| OA    | 0.60                   | 0.70   | 0.82         |
| OCA   | 0.40                   | 0.60   | 0.78         |
