# Supplementary material
Source: PubMed Central journal article supplement (PMC9341240)

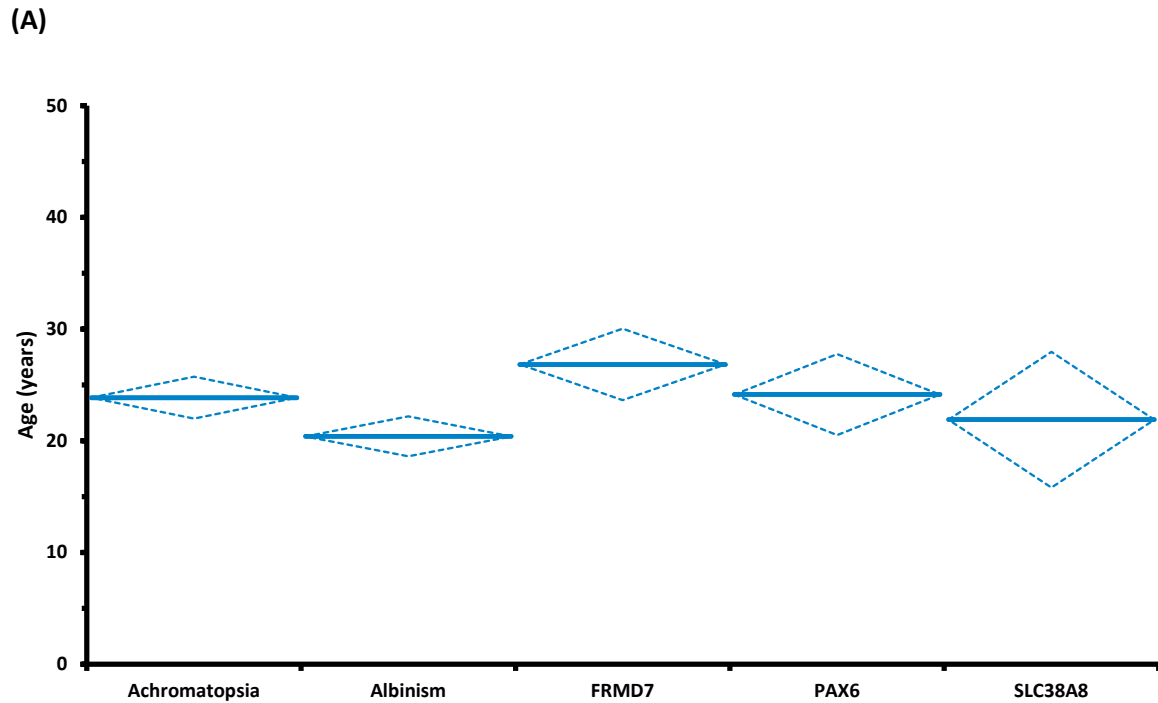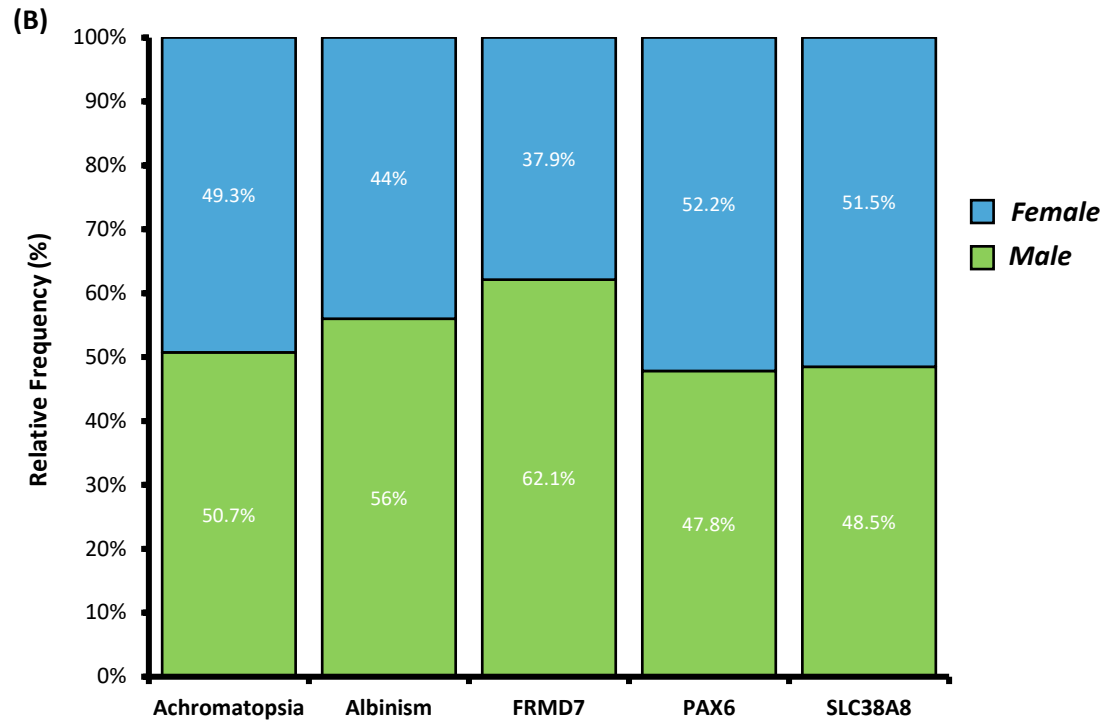

Supplement: NIHMS1816630-supplement-2.pdf [file NIHMS1816630-supplement-2.pdf]
